# Supplementary material for: Structure of RNA polymerase bound to ribosomal 30S subunit
Source: eLife journal article supplement (doi:10.7554/elife.28560), 2017-10-13
Supplement: supp [file elife-28560-supp-v1.zip]

Archive with 9 entries (9 files):
- elife_poa_e28560_Figure_1_figure_supplement_3.png
- elife_poa_e28560_Figure_3_figure_supplement_1.png
- elife_poa_e28560_Figure_1_figure_supplement_4.png
- elife_poa_e28560_Figure_1_figure_supplement_1.png
- elife_poa_e28560_Figure_1_figure_supplement_5.png
- elife_poa_e28560_Transparent_Reporting_File.pdf
- elife_poa_e28560_Figure_2_figure_supplement_2.png
- elife_poa_e28560_Figure_2_figure_supplement_1.png
- elife_poa_e28560_Figure_1_figure_supplement_2.png
