# Supplementary figures and images for: Structure of RNA polymerase bound to ribosomal 30S subunit
Source: eLife journal article supplement (doi:10.7554/elife.28560), 2017-10-13

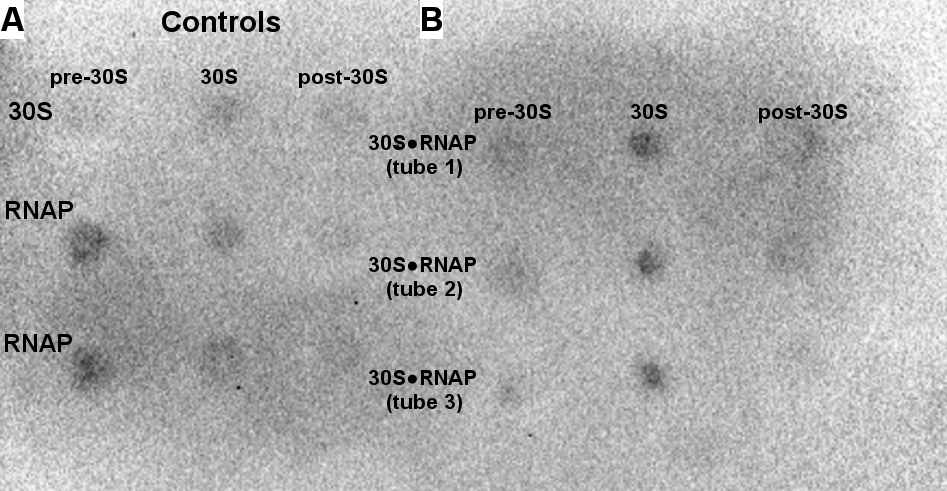

Supplement: supp [file elife-28560-supp-v1.zip › elife_poa_e28560_Figure_1_figure_supplement_3.png]

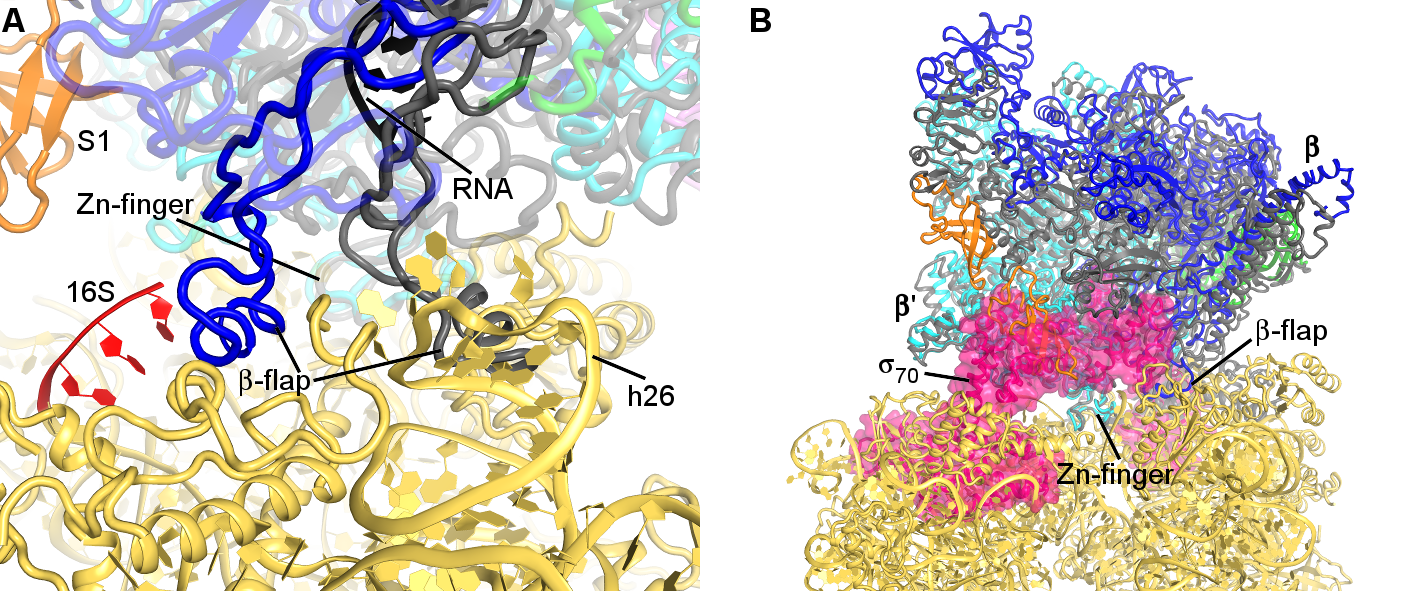

Supplement: supp [file elife-28560-supp-v1.zip › elife_poa_e28560_Figure_3_figure_supplement_1.png]

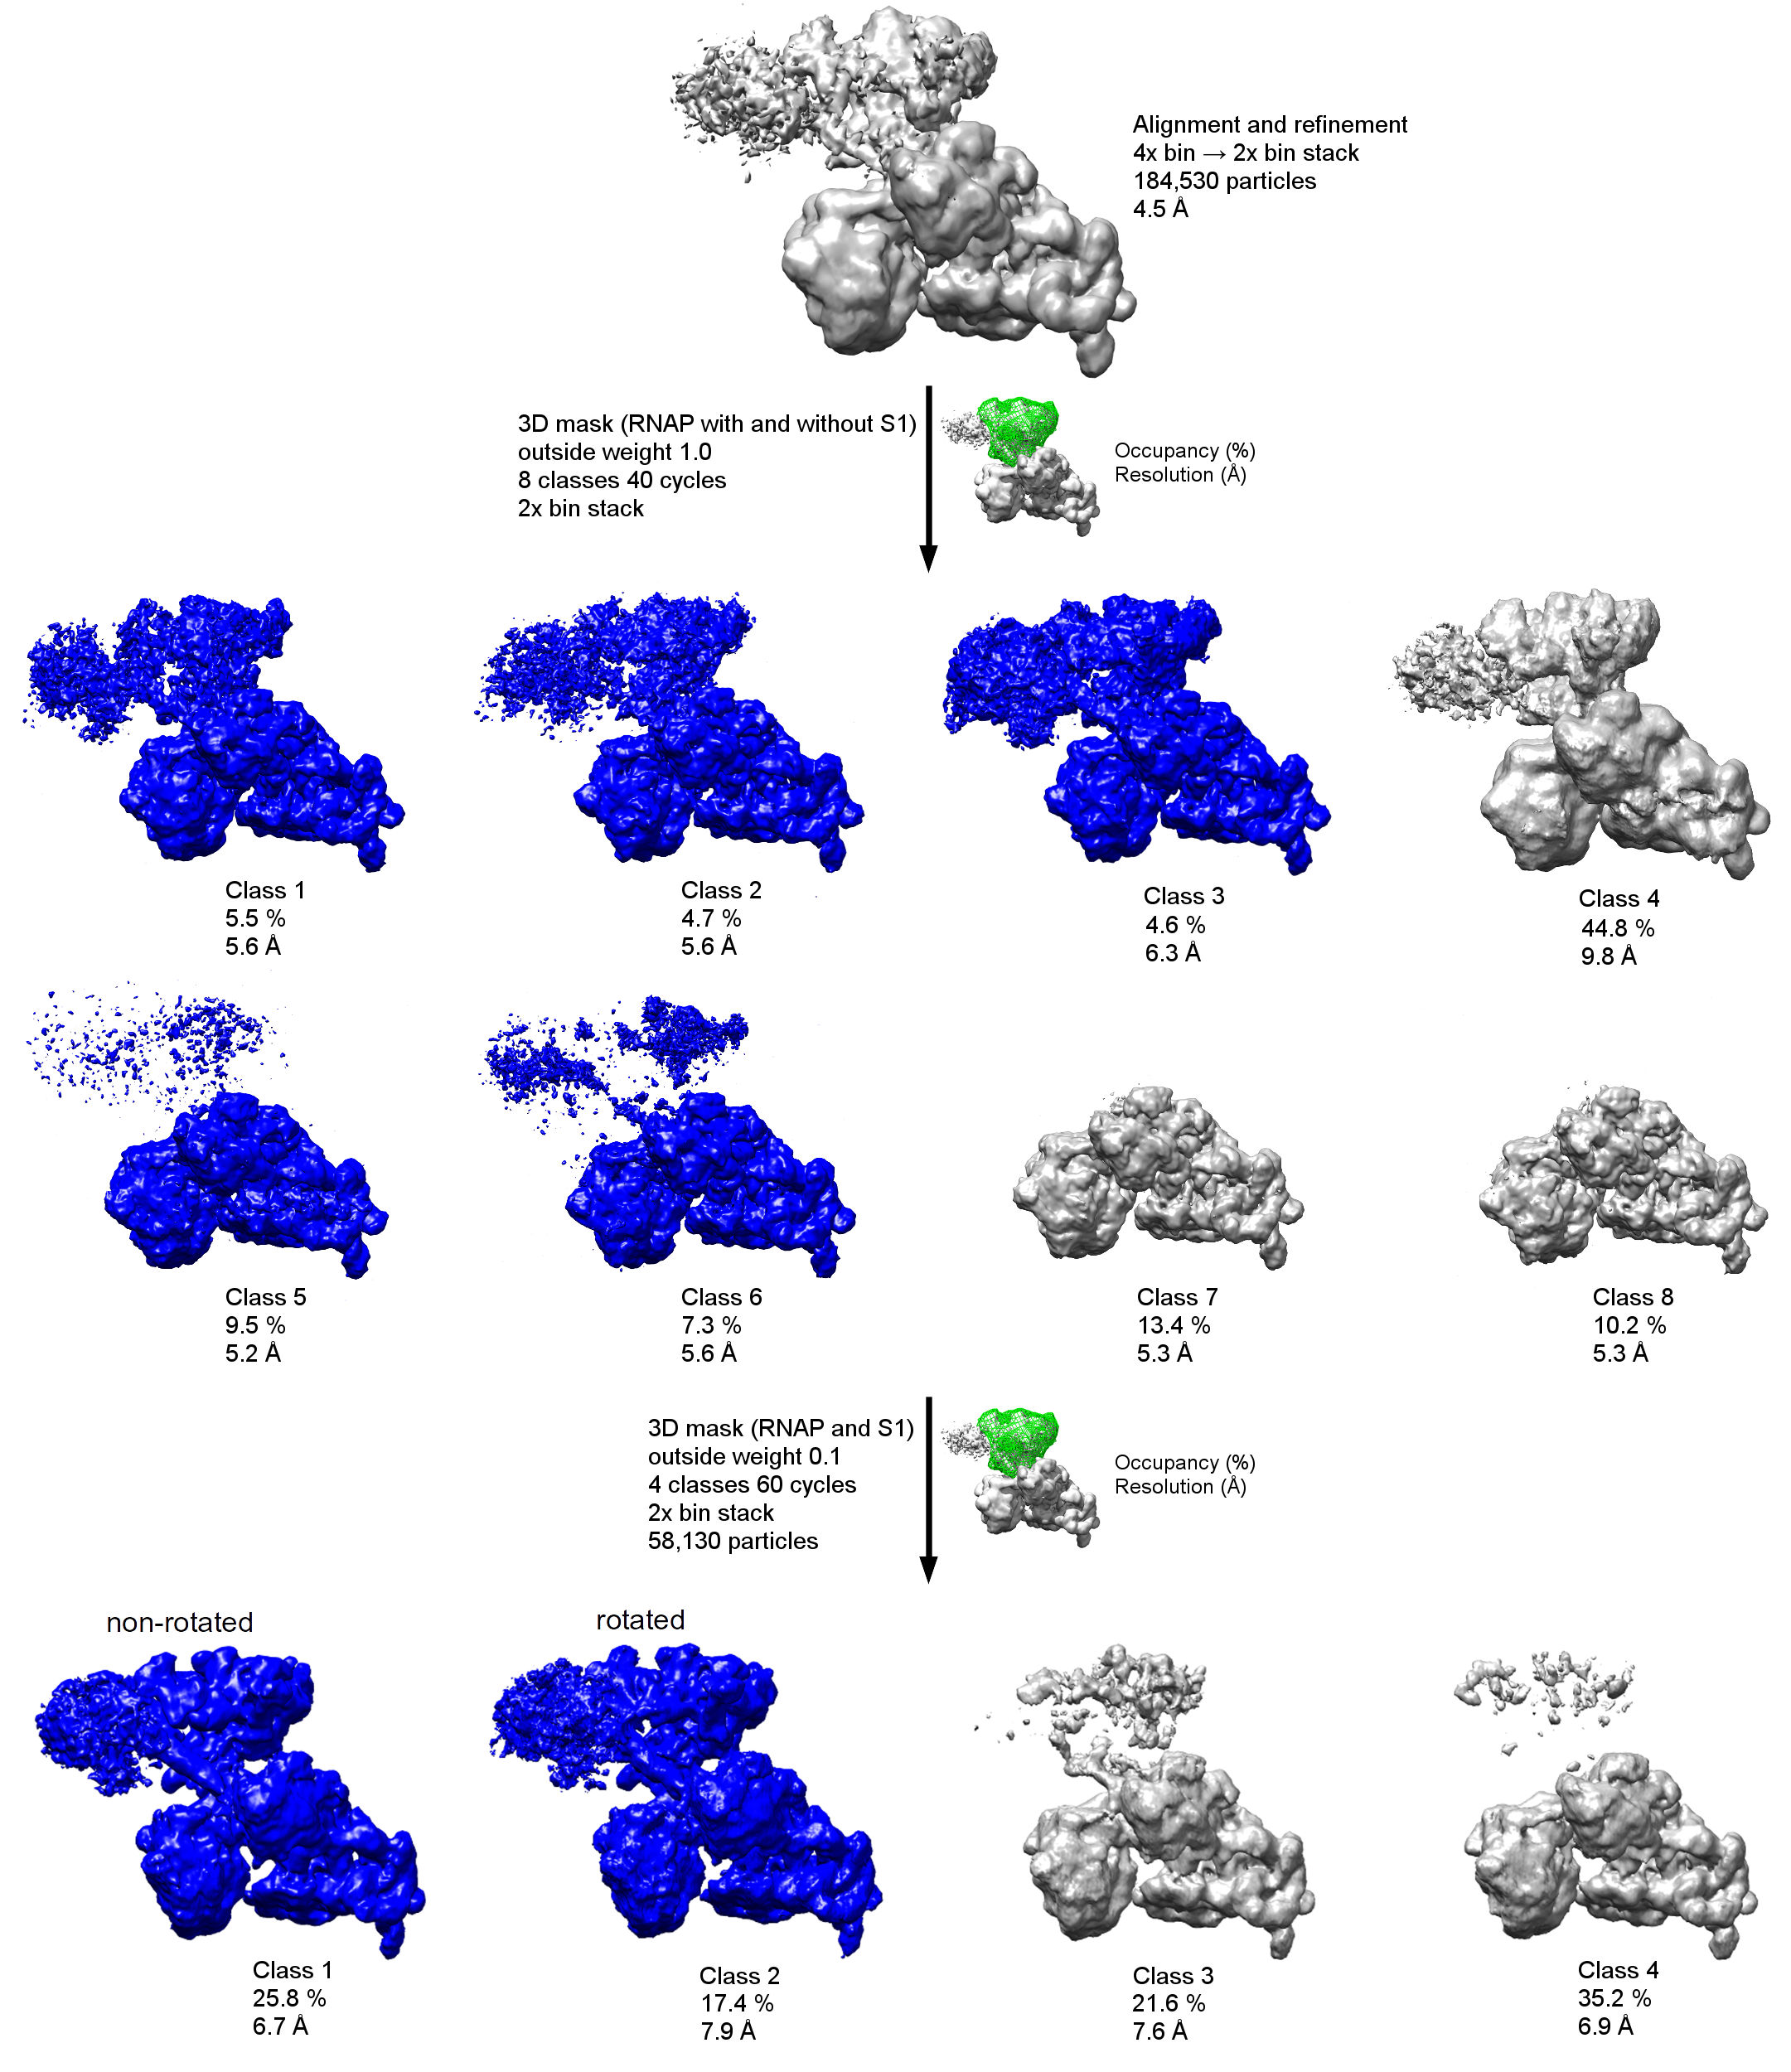

Supplement: supp [file elife-28560-supp-v1.zip › elife_poa_e28560_Figure_1_figure_supplement_4.png]

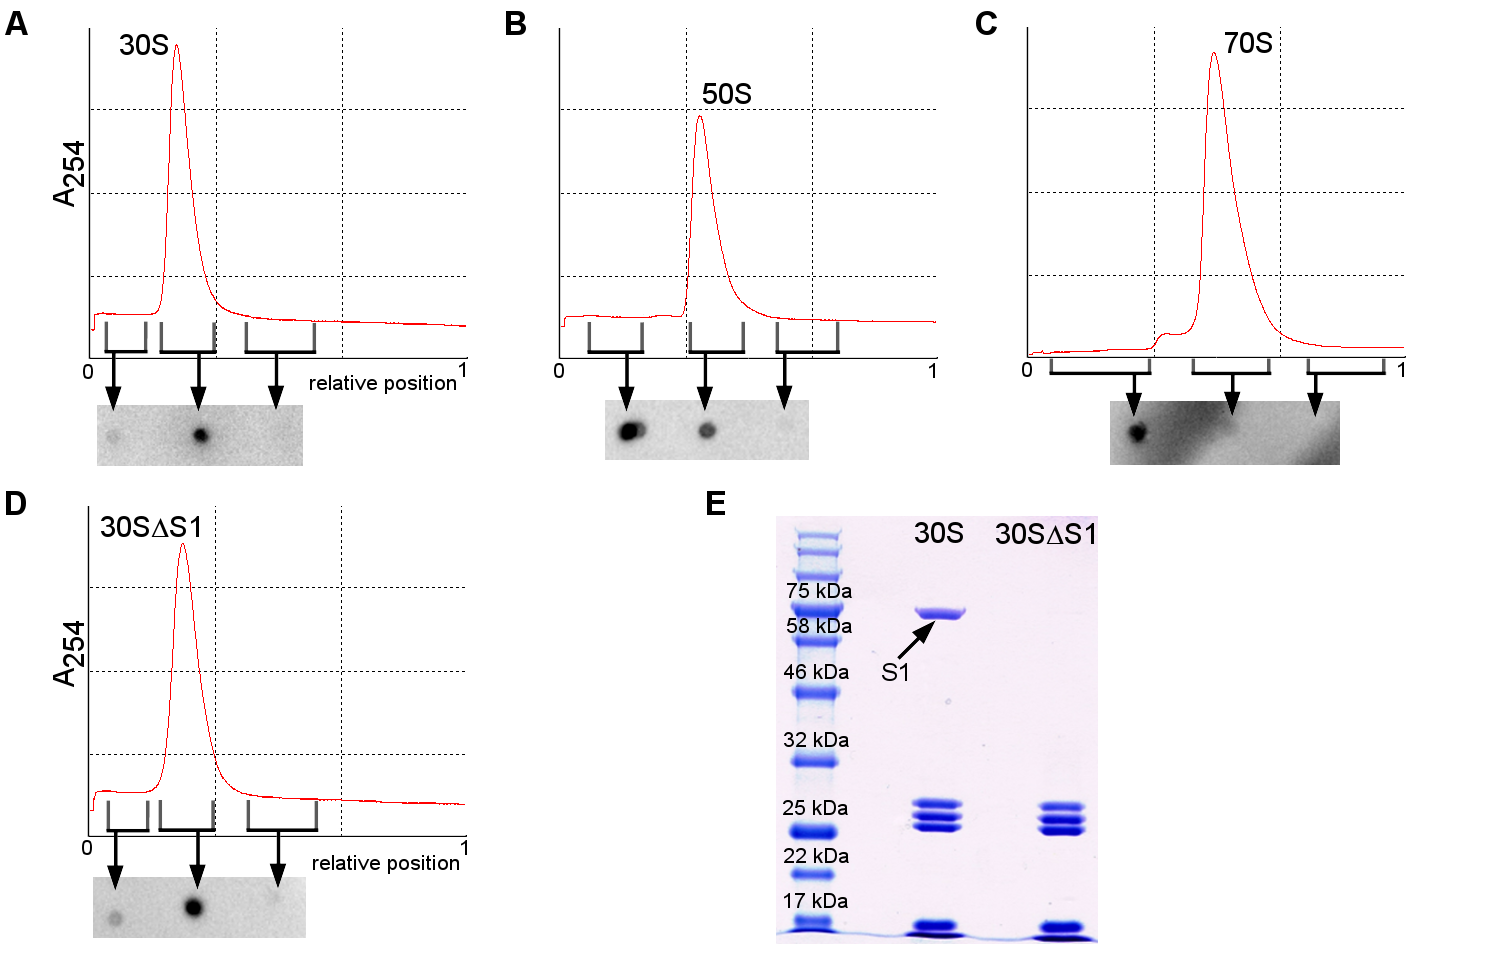

Supplement: supp [file elife-28560-supp-v1.zip › elife_poa_e28560_Figure_1_figure_supplement_1.png]

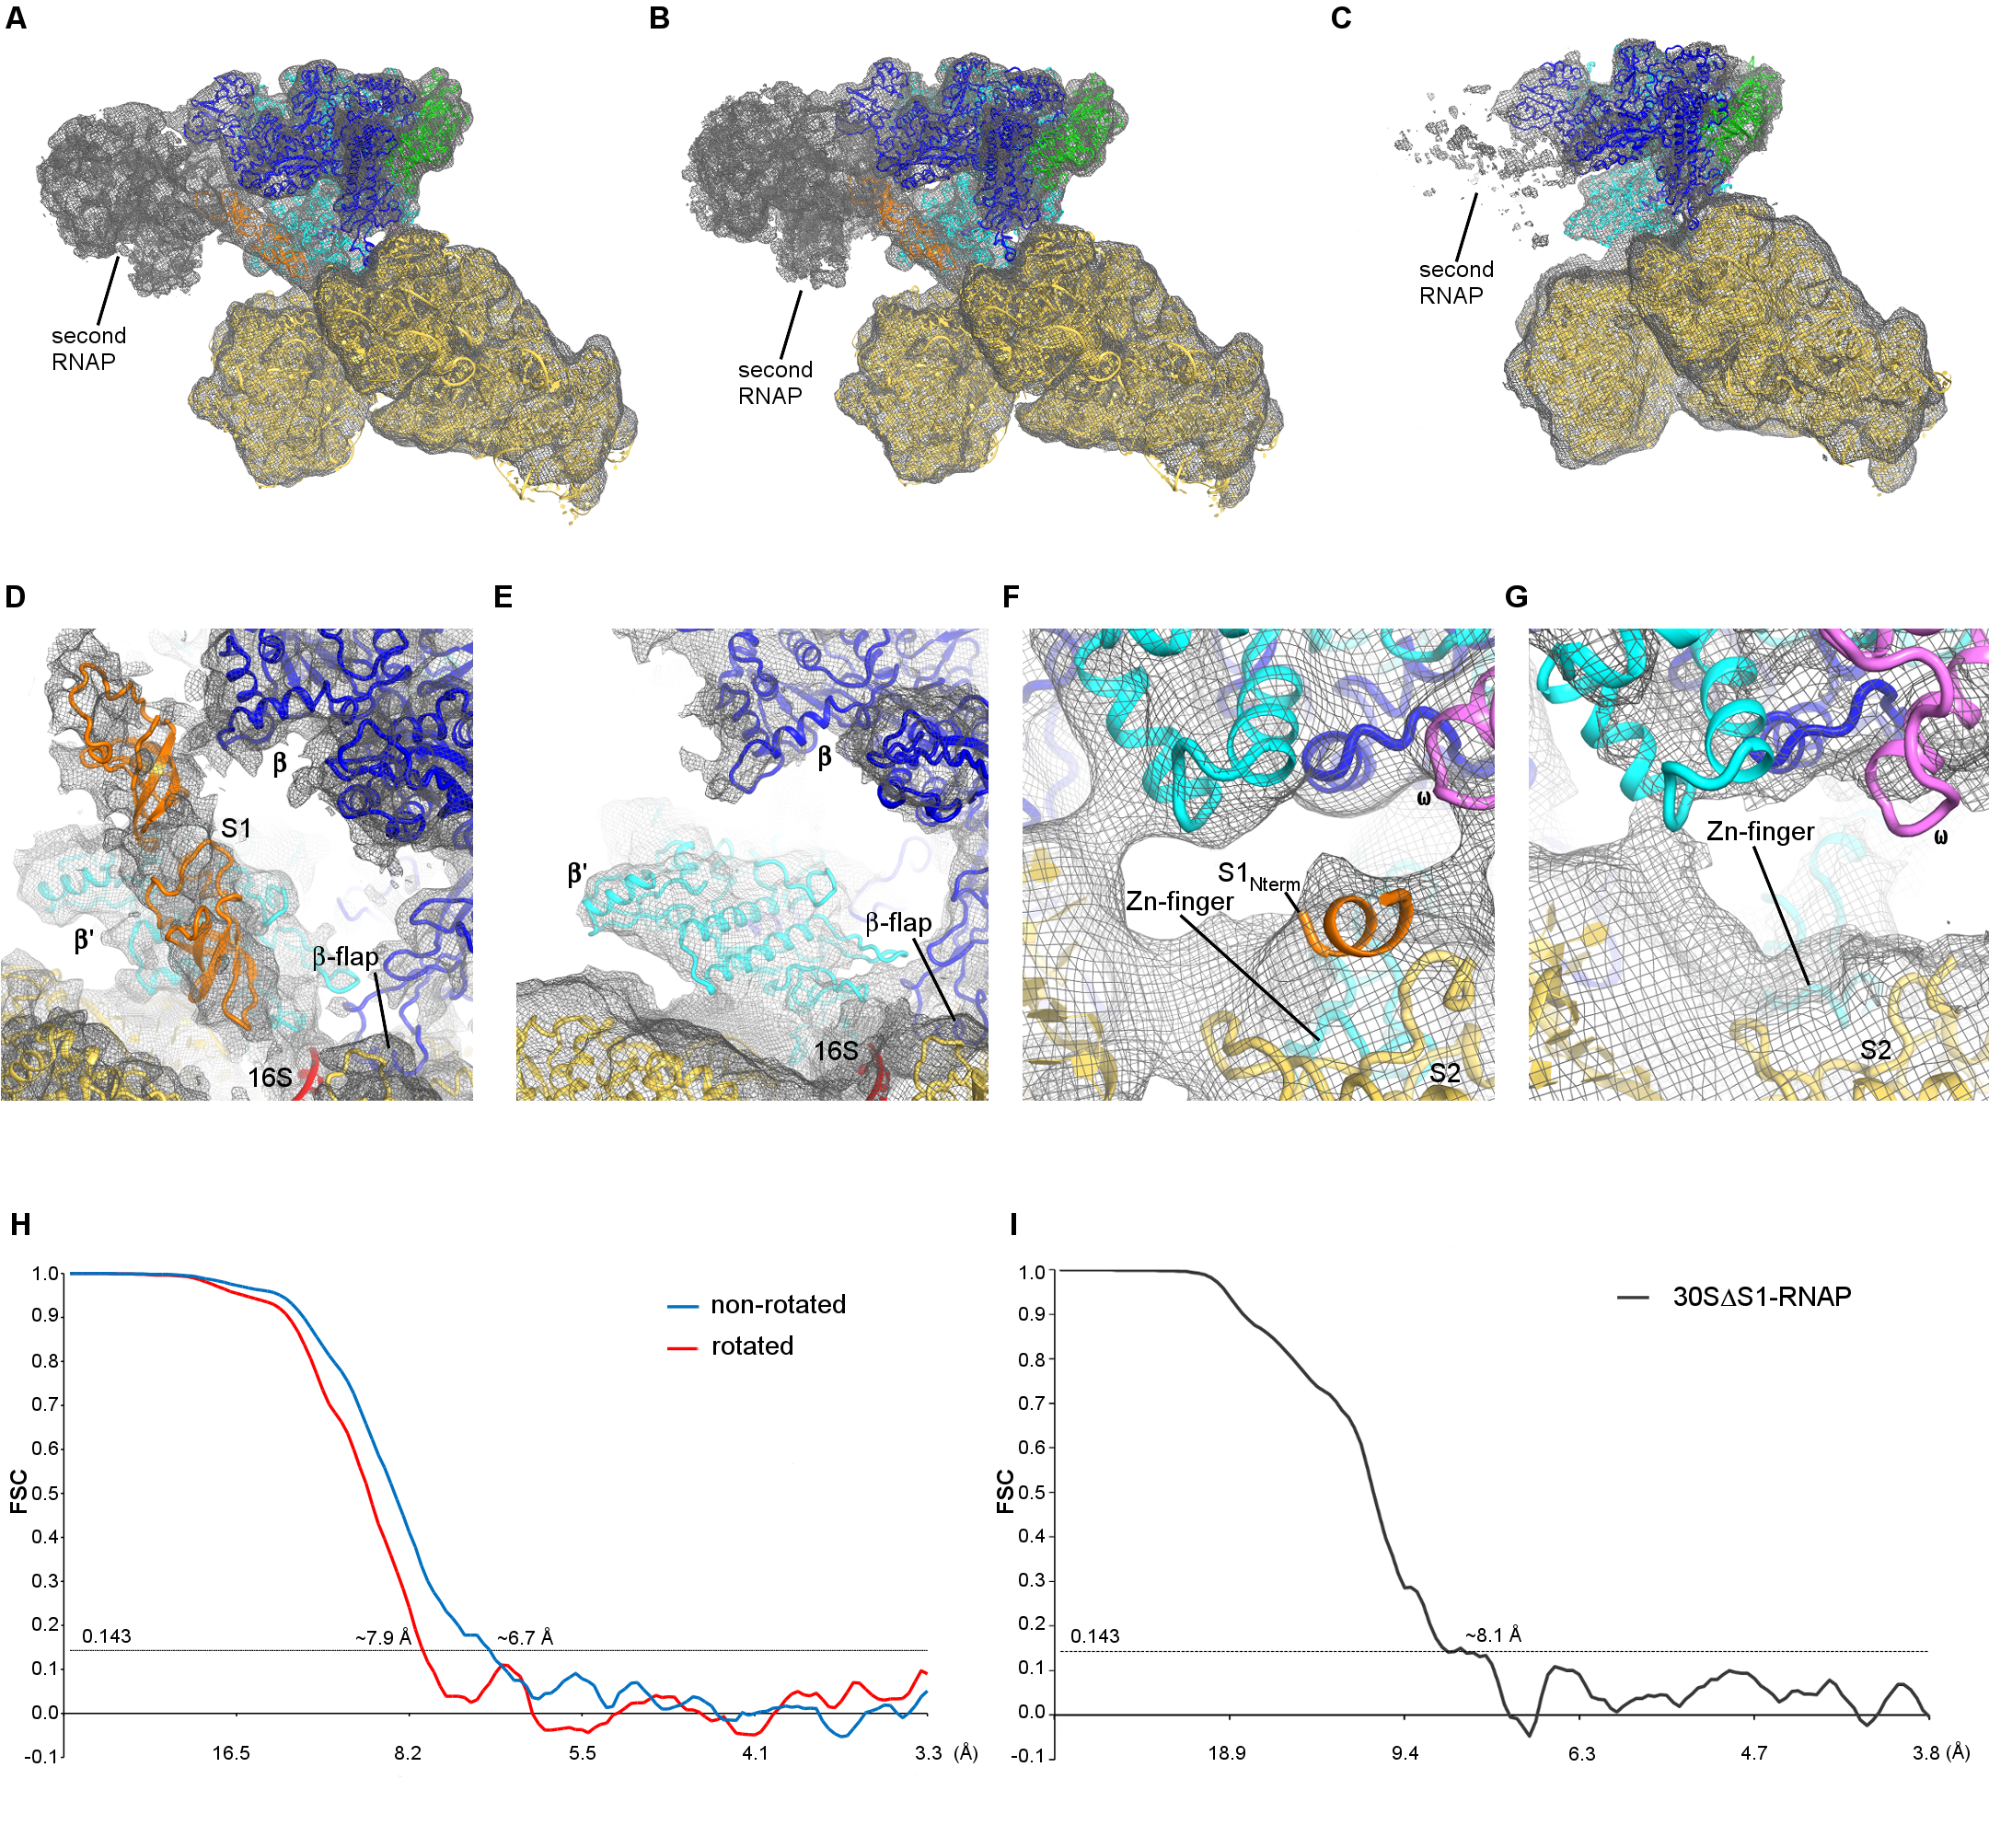

Supplement: supp [file elife-28560-supp-v1.zip › elife_poa_e28560_Figure_1_figure_supplement_5.png]

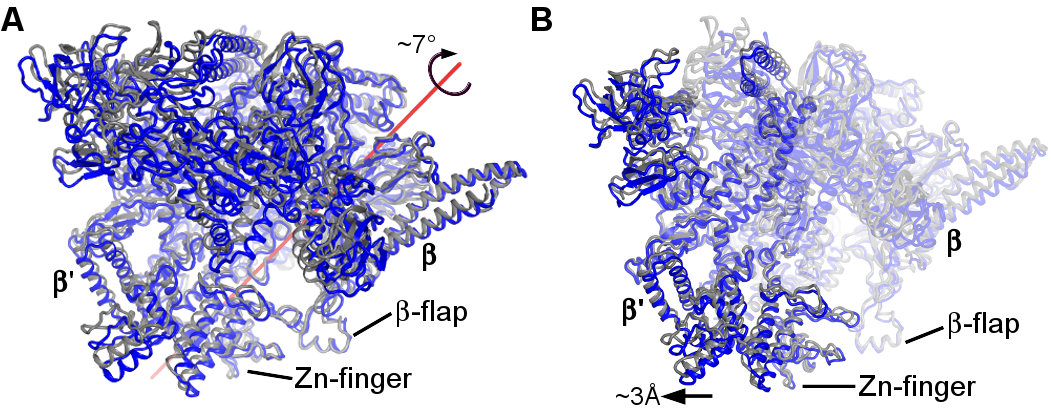

Supplement: supp [file elife-28560-supp-v1.zip › elife_poa_e28560_Figure_2_figure_supplement_2.png]

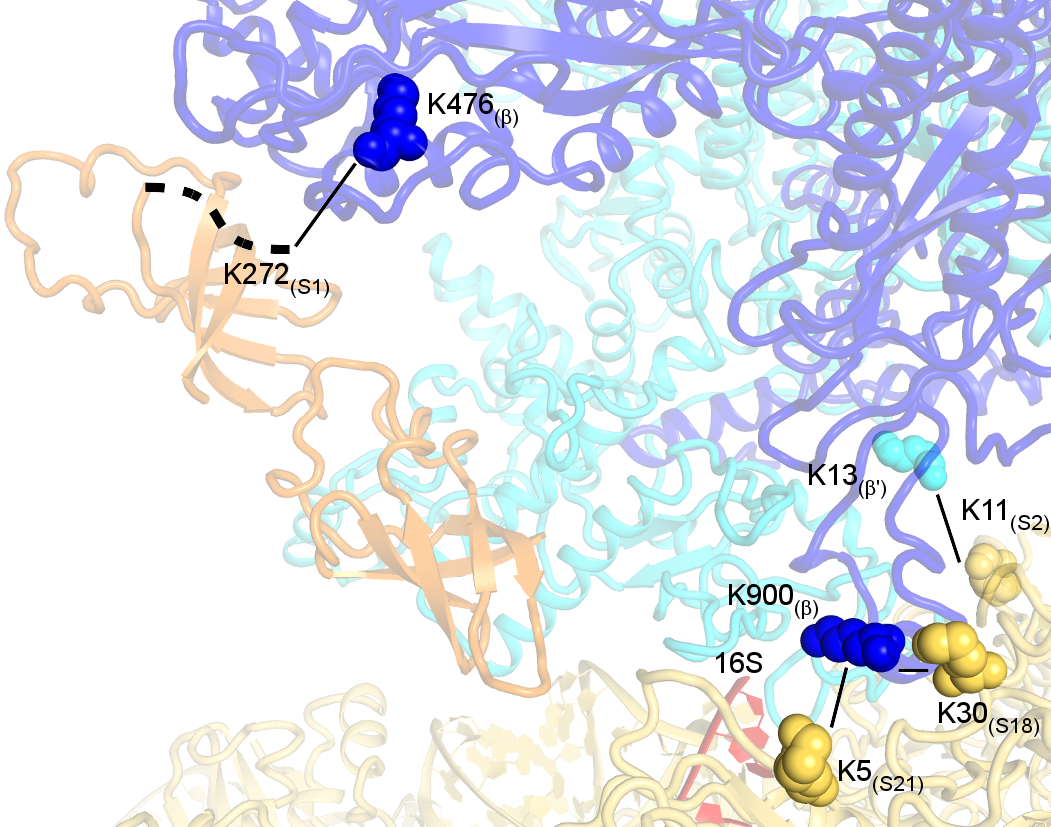

Supplement: supp [file elife-28560-supp-v1.zip › elife_poa_e28560_Figure_2_figure_supplement_1.png]

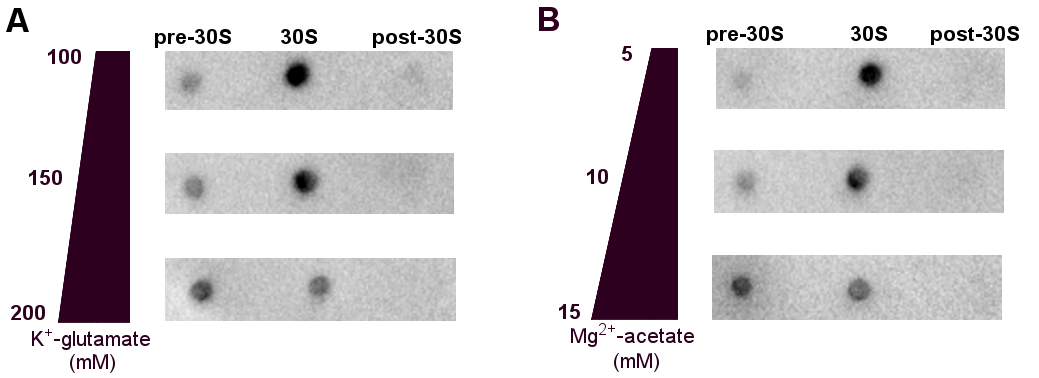

Supplement: supp [file elife-28560-supp-v1.zip › elife_poa_e28560_Figure_1_figure_supplement_2.png]
